# Fractal landscape method: an alternative approach to measuring area-restricted searching behavior

Y. Tremblay, A. J. Roberts and D. P. Costa

10.1242/jeb.005462

There was an error published in *J. Exp. Biol.* **210**, 935-945.

In Fig. 3A, the numbers assigned to each peak of the fractal landscape were displaced in relation to the peaks.

The correct version of the figure is reproduced below.

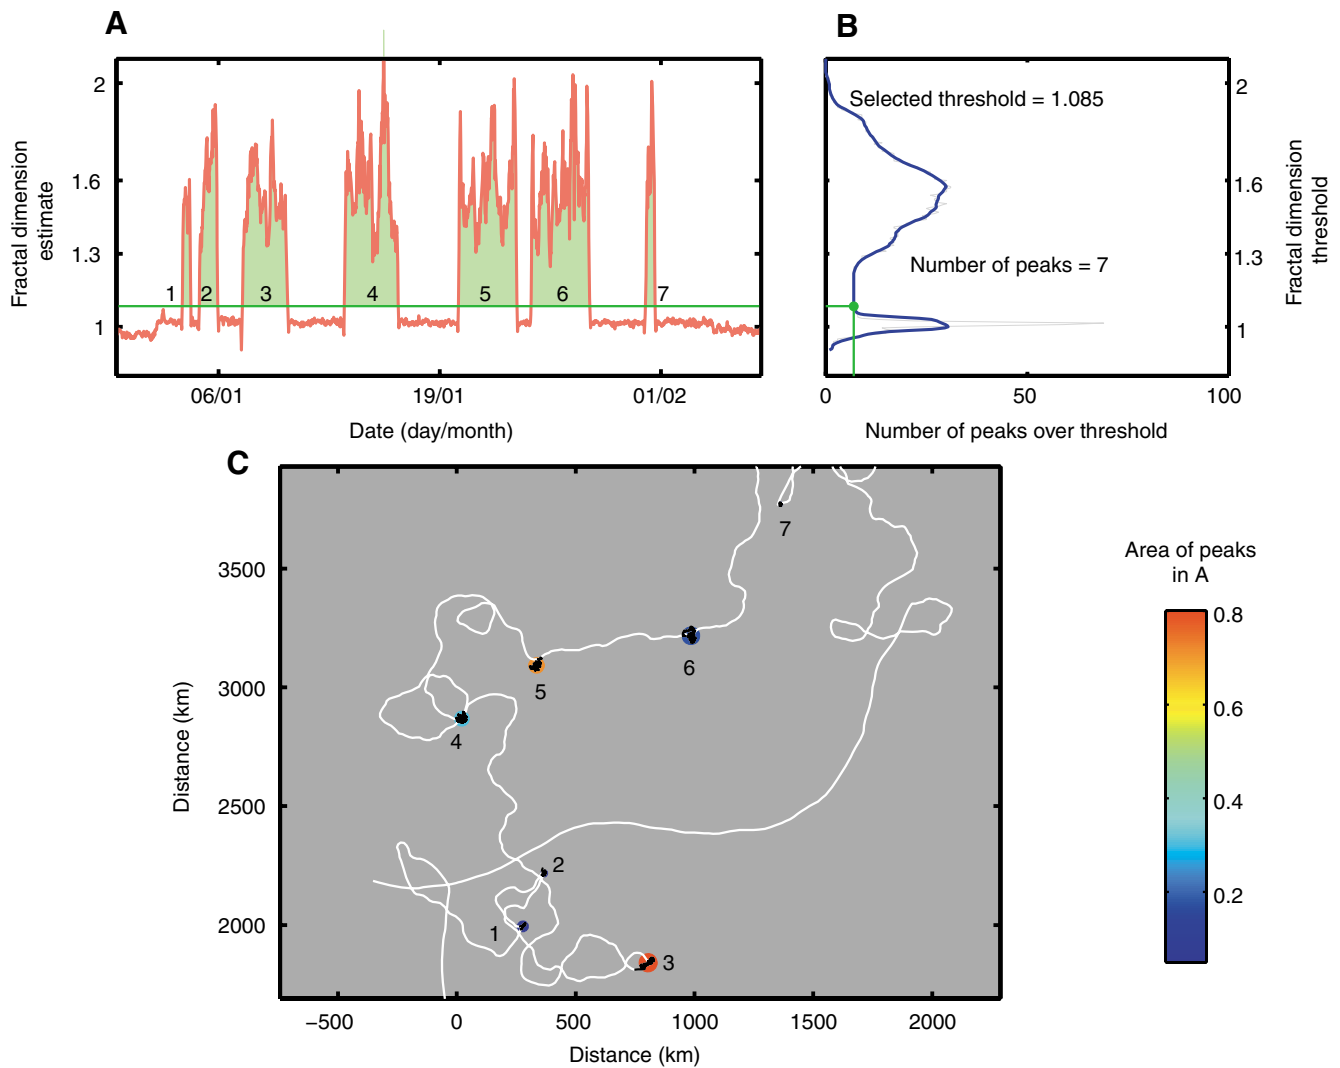

We apologise to authors and readers for this error.
